# Supplementary material for: Oral administration of cannabis with lipids leads to high levels of cannabinoids in the intestinal lymphatic system and prominent immunomodulation
Source: Springer Nature journal article supplement (doi:10.1038/s41598-017-15026-z), 2017-10-31
Supplement: MOESM1 [file 41598_2017_15026_MOESM1_ESM.pdf]

# **Oral administration of cannabis with lipids leads to high levels of cannabinoids in the intestinal lymphatic system and prominent immunomodulation**

Atheer Zgair<sup>1,2</sup>, Jong Bong Lee<sup>1</sup>, Jonathan C. M. Wong<sup>1</sup>, Dhiaa A. Taha<sup>1</sup>, Jehan Aram<sup>3</sup>,  
Daisy Di Virgilio<sup>1</sup>, Joshua W. McArthur<sup>1</sup>, Yu-Kit Cheng<sup>1</sup>, Ivo M. Hennig<sup>4</sup>, David A. Barrett<sup>1</sup>,  
Peter M. Fischer<sup>1</sup>, Cris S. Constantinescu<sup>3</sup>, and Pavel Gershkovich<sup>1,\*</sup>

<sup>1</sup>School of Pharmacy, University of Nottingham, Nottingham NG7 2RD, United Kingdom

<sup>2</sup>College of Pharmacy, University of Anbar, Anbar, Iraq

<sup>3</sup>Division of Clinical Neuroscience, University of Nottingham and Queen's Medical Centre,  
Nottingham NG7 2UH, United Kingdom

<sup>4</sup>Nottingham City Hospital, Nottingham University Hospitals NHS Trust, Nottingham NG5  
1PB, United Kingdom

\*To whom correspondence should be addressed:

Pavel Gershkovich, PhD

Division of Molecular Therapeutics and Formulation

School of Pharmacy

Centre for Biomolecular Sciences

The University of Nottingham

University Park, NG7 2RD

Nottingham, UK

Tel: +44 (0) 115 846 8014

Fax: +44 (0) 115 951 3412

Email: [Pavel.Gershkovich@nottingham.ac.uk](mailto:Pavel.Gershkovich@nottingham.ac.uk)

## Supplementary Information

**Table S1.** Times of maximum concentration in plasma ( $t_{\max}$ ) and one-hour prior to  $t_{\max}$  ( $t_{\max} - 1\text{h}$ ) following oral administration of lipid-free formulation (12 mg/kg) and long-chain triglyceride (LCT)-based formulation (12 mg/kg) of cannabidiol (CBD) and  $\Delta^9$ -tetrahydrocannabinol (THC) to rats<sup>18</sup>.

| Cannabinoid | Formulation | $t_{\max}$ (h) | $t_{\max} - 1\text{h}$ |
|-------------|-------------|----------------|------------------------|
| CBD         | lipid-free  | 3              | 2                      |
|             | LCT-based   | 3              | 2                      |
| THC         | lipid-free  | 2              | 1                      |
|             | LCT-based   | 3              | 2                      |

**Table S2.** Chromatographic conditions for the detection of cannabidiol (CBD) and  $\Delta^9$ -tetrahydrocannabinol (THC) in rat plasma, intestinal lymph fluid, mesenteric lymph nodes (MLN), spleen, and human chylomicron (CM) samples<sup>18,53,54</sup>.

|     | Medium           | Mobile phase                                         | Stationary phase                       | Flow rate (mL.min <sup>-1</sup> ) | Oven temperature (°C) | IS                | Detector/ conditions                                             |
|-----|------------------|------------------------------------------------------|----------------------------------------|-----------------------------------|-----------------------|-------------------|------------------------------------------------------------------|
| CBD | Plasma and lymph | ACN and Water (62:38, v/v)                           | ACE C18-PFP 150 × 4.6 mm, 3 μm         | 1                                 | 55                    | DDT               | UV/ 220 nm                                                       |
|     | MLN              | ACN and Water (75:25, v/v)                           | ACE Excel Super C18 100 × 4.6 mm, 5 μm | 0.8                               | 43                    | DDT               | UV/ 230 nm                                                       |
|     | Spleen           | ACN and Water (75:25, v/v)                           | ACE Excel Super C18 100 × 4.6 mm, 5 μm | 0.8                               | 43                    | DDT               | UV/ 230 nm                                                       |
|     | Human-CM         | ACN and Water (75:25, v/v)                           | ACE Excel Super C18 100 × 4.6 mm, 5 μm | 0.8                               | 43                    | DDT               | UV/ 210 nm                                                       |
| THC | Plasma and lymph | ACN and Water (62:38, v/v)                           | ACE C18-PFP 150 × 4.6 mm, 3 μm         | 1                                 | 55                    | DDT               | UV/ 220 nm                                                       |
|     | MLN              | 0.1% (v/v) formic acid in ACN and Water (90:10, v/v) | Waters XBridge C18 75 × 2.1 mm, 2.5 μm | 0.3                               | 60                    | VitD <sub>3</sub> | MS/MS<br>THC: + 315.2/193.0<br>VitD <sub>3</sub> : + 385.3/259.3 |
|     | Spleen           | 0.1% (v/v) formic acid in ACN and Water (90:10, v/v) | Waters XBridge C18 75 × 2.1 mm, 2.5 μm | 0.3                               | 60                    | VitD <sub>3</sub> | MS/MS<br>THC: + 315.2/193.0<br>VitD <sub>3</sub> : + 385.3/259.3 |
|     | Human-CM         | ACN and Water (90:10, v/v)                           | ACE Excel Super C18 100 × 4.6 mm, 5 μm | 0.6                               | 43                    | PB                | UV/ 220 nm                                                       |

IS, internal standard; DDT, 4,4-dichlorodiphenyltrichloroethane; PB, probucol.

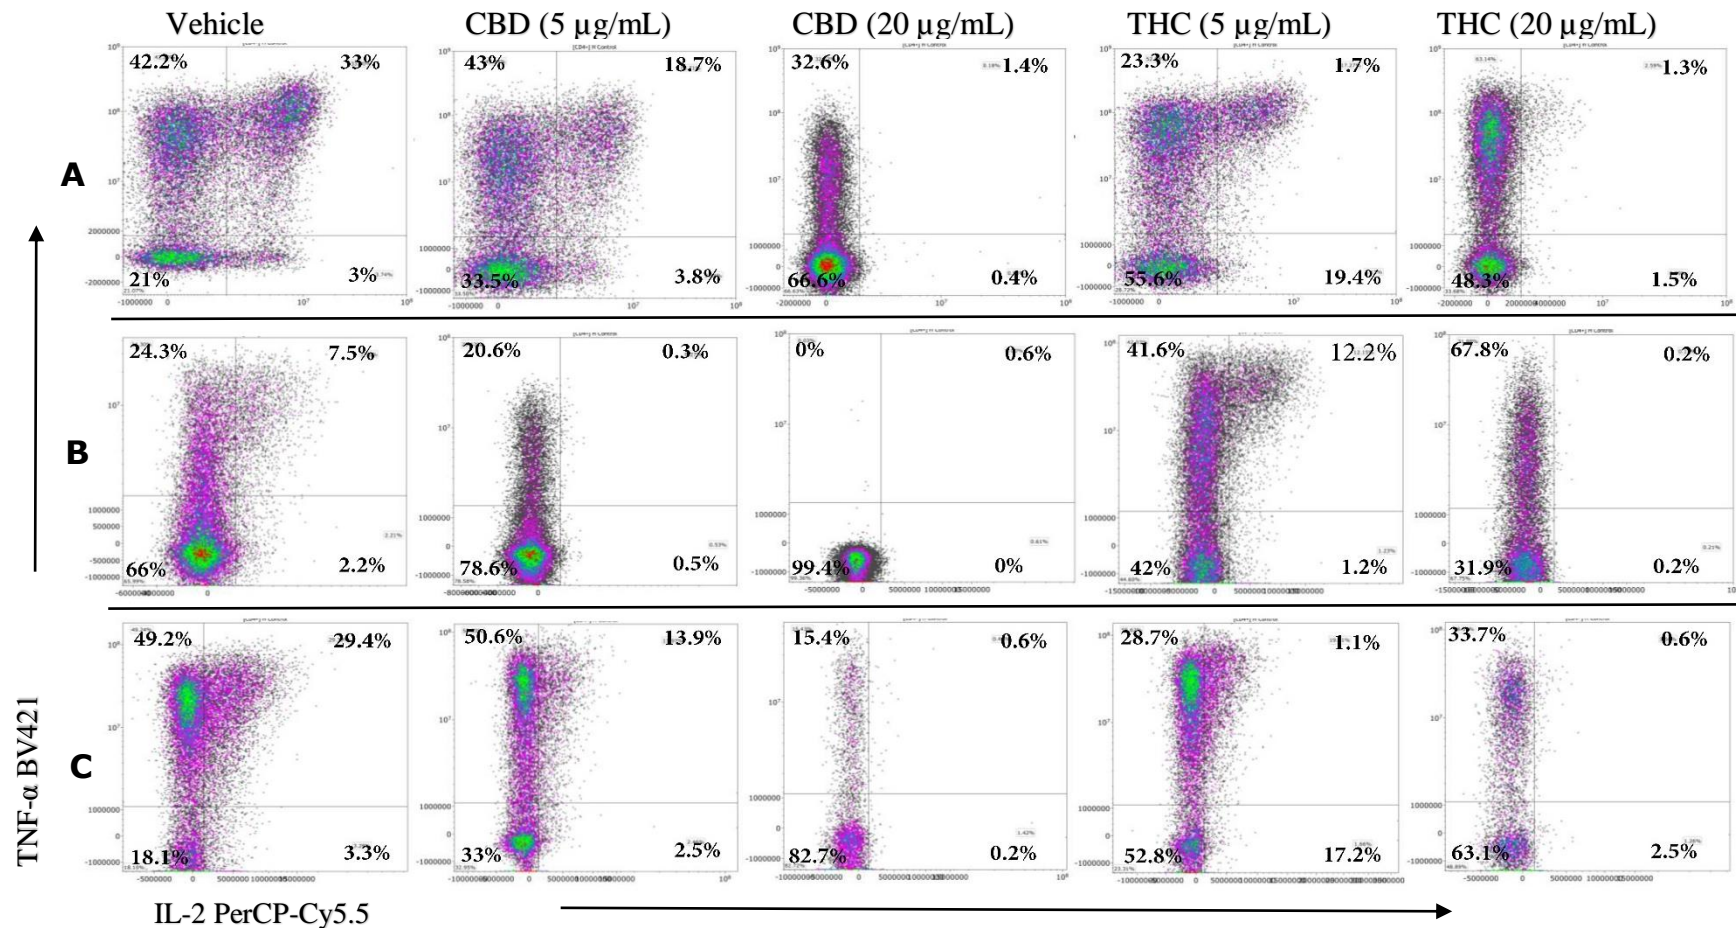

**Figure S1.** Representative flow cytometry histograms showing the effects of cannabidiol (CBD) and  $\Delta^9$ -tetrahydrocannabinol (THC) at concentrations of 5 and 20  $\mu\text{g/mL}$  on TNF- $\alpha$  and IL-2 expressing CD3<sup>+</sup> T cells isolated from human participants. Cells were stimulated by phorbol myristate acetate and ionomycin (PMA & I) in the presence of brefeldin A. **Panel A:** Effect of CBD and THC on PBMC from a healthy volunteer, **Panel B:** Effect of CBD and THC on PBMC from a multiple sclerosis (MS) patient, **Panel C:** Effect of CBD and THC on PBMC from a patient on chemotherapy to treat non-seminomatous germ cell tumours (NSGCT).

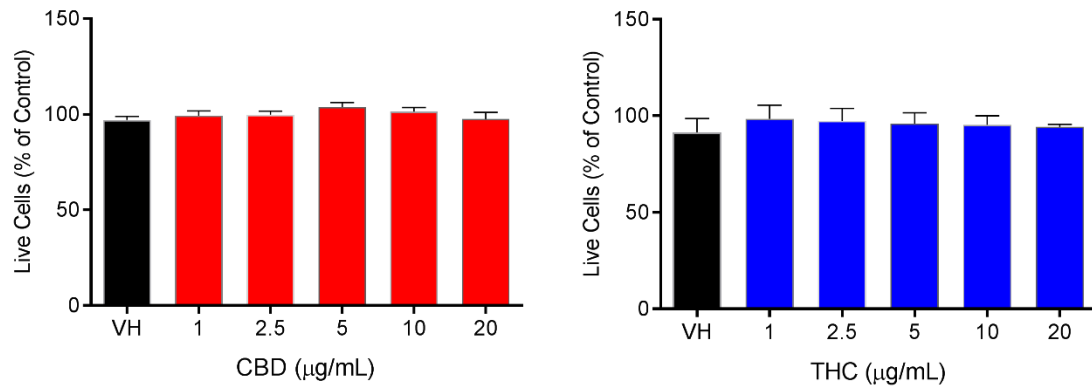

**Figure S2.** Effects of cannabidiol (CBD) and  $\Delta^9$ -tetrahydrocannabinol (THC) at concentrations of 1-20  $\mu\text{g/mL}$  on the viability of  $\text{CD3}^+$  T cells isolated from healthy human participants ( $n = 5$ ). Statistical analysis was performed using one-way ANOVA with Fisher's LSD test. No statistical differences were observed compared to the vehicle (DMSO)-treated cells (VH).

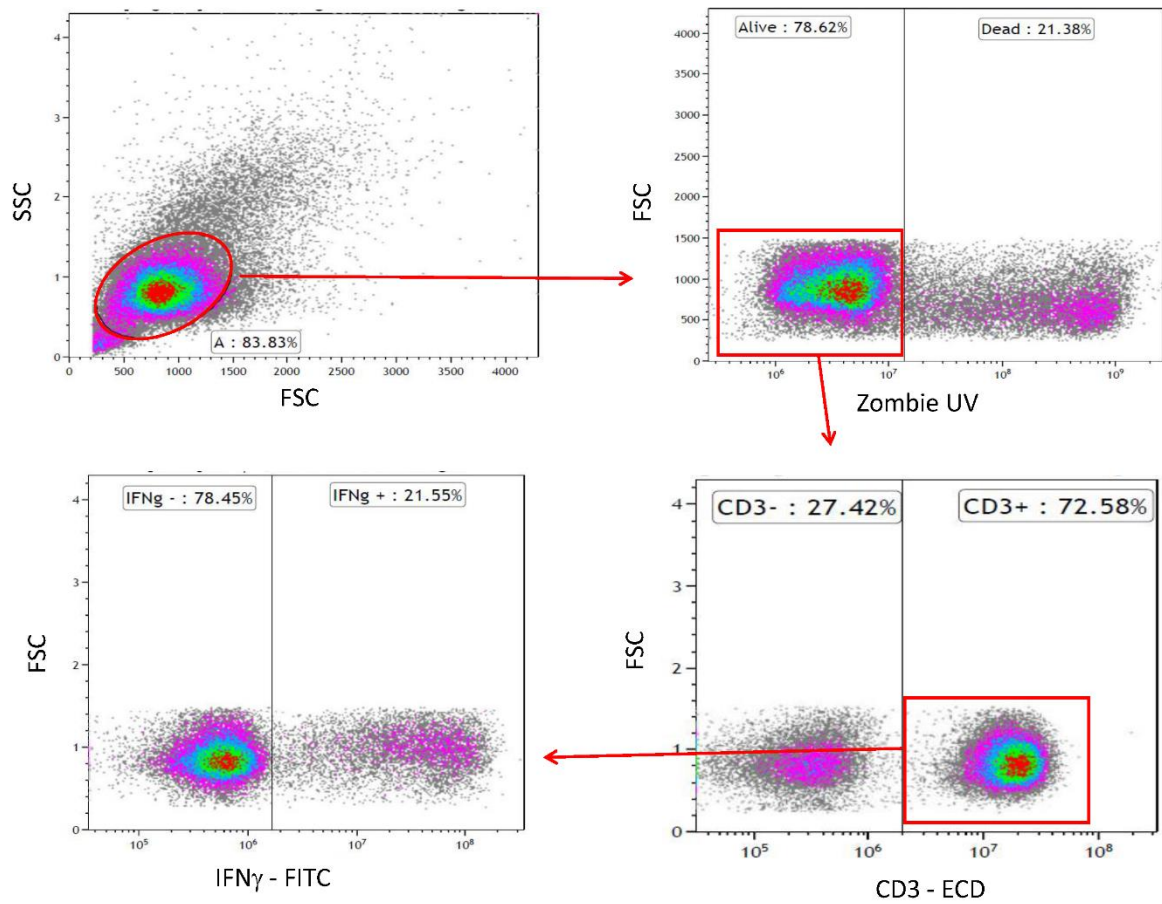

**Figure S3.** The gating strategy used for the analysis of flow cytometry data for the assessment of intracellular cytokines (IFN $\gamma$  as an example) as a response to treating immune cells with cannabidiol (CBD) and  $\Delta^9$ -tetrahydrocannabinol (THC).
